1  
2  
3  
4  
5  
6  
7  
8  
9  
10  
11  
12  
13  
14  
15  
16  
17  
18  
19  
20  
21  
22  
23  
24  
25  
26  
27  
28  
29  
30  
31  
32

## **Effects of signal features and background noise on distance cue discrimination by a songbird**

**Nina U. Pohl, Georg M. Klump, Ulrike Langemann**

Cluster of Excellence "Hearing4all", Animal Physiology and Behaviour Group, Department  
for Neuroscience, University of Oldenburg, Germany

Short title: distance cue discrimination

Word count: 6981 (excluding title page, summary, tables, references and figure captions)

Correspondence should be addressed to:

Ulrike Langemann

Cluster of Excellence "Hearing4all"

Animal Physiology and Behaviour Group

Department for Neuroscience

School of Medicine and Health Sciences

University of Oldenburg

D-26111 Oldenburg, Germany

Phone: xx49-441-798-3401

E-mail: [ulrike.langemann@uni-oldenburg.de](mailto:ulrike.langemann@uni-oldenburg.de)

33 **Abstract**

34 During the transmission of acoustic signals, the spectral and temporal properties of the  
35 original signal are degraded and with increasing distance more and more echo patterns are  
36 imposed. It is well known that these physical alterations provide useful cues to assess the  
37 distance of a sound source. Previous studies in birds have shown that birds employ the degree  
38 of degradation of a signal to estimate the distance of another singing male (referred to as  
39 ranging). Little is known about how acoustic masking by background noise interferes with  
40 ranging and whether the number of song elements and stimulus familiarity affect the ability to  
41 discriminate between degraded and undegraded signals. In this study we trained great tits  
42 (*Parus major* L.) to discriminate between signal variants in two background types, a silent  
43 condition and a condition consisting of a natural dawn chorus. We manipulated great tit song  
44 types to simulate patterns of reverberation and degradation equivalent to transmission  
45 distances of between 5 and 160 m. The birds' responses were significantly affected by the  
46 differences between the signal variants and by background type. In contrast, stimulus  
47 familiarity or their element number had no significant effect on signal discrimination.  
48 Although background type was a significant main effect with respect to the response  
49 latencies, the great tits' overall performance in the noisy dawn chorus was similar to the  
50 performance in silence.

51

52

53 **Key Words:**

54 acoustic communication, ranging, great tit, *Parus major* L.

55

56

57 **List of abbreviations**

58 SPL            Sound-pressure level

59 GLMM        general linear mixed model

60 ANOVA      Analysis of variance

61

## 62 **Introduction**

63 Acoustic signals and acoustic communication is especially useful at long distances. Territorial  
64 songbirds employ acoustic signals both for mate attraction and for defending a territory  
65 (Collins, 2004). Degradation of the signals during transmission will provide the recipients  
66 with cues revealing the distance of the sender, e.g., cues that reveal the position of a rival  
67 male relative to the recipient's territory boundary. Assessing the distance of a sound source by  
68 its physical properties is often referred to as ranging (Morton 1986). The major cues for  
69 ranging are a change in overall amplitude of the signal, modifications of the signal envelope  
70 with distance (e.g., by reverberations, Wiley and Richards, 1982), and a change of the signal's  
71 frequency spectrum (e.g., by frequency-dependent attenuation, Marten and Marler 1977). All  
72 of these cues have been shown to be useful to birds, although to a different extent, and for the  
73 evaluation of some of these cues prior knowledge of the signal has been suggested to play a  
74 role (Holland et al., 2001; Naguib et al., 2000).

75

76 Most evidence for distance perception and ranging in birds comes from field experiments.  
77 Commonly conspecific song is played back from a loudspeaker to a territorial male and the  
78 behaviour of the bird in response to these test signals is recorded. The signals are manipulated  
79 to simulate different distances of a potential intruder. The experimental bird will usually  
80 defend its territory and will approach the simulated intruder. From the flight distance relative  
81 to the degree of degradation applied to the signal the experimenter can then infer the location  
82 of the sound source perceived by the bird (Naguib and Wiley, 2001). In field experiments, the  
83 effect of the subject's propensity to respond as well as its perceptual ability are difficult to  
84 separate. Laboratory experiments can help not only to solve this dilemma by carefully  
85 controlling the motivation of the subjects and response contingency, they can also  
86 complement the knowledge obtained from the field. Laboratory studies on ranging in birds  
87 investigated cues important for distance discrimination together with species identification  
88 (Phillmore et al., 1998; Radziwon et al., 2011) or as a function of previous experience  
89 (Phillmore et al., 2003). So far, however, little is known about how much the ubiquitous  
90 background noise affects the perception of ranging cues in the natural environment (Brumm  
91 and Naguib, 2009).

92

93 Here we employ trained wild birds to evaluate sets of signals representing various  
94 transmission distances in order to compare the birds' sensitivity for ranging cues in two  
95 different background types. The presence of background noise in the natural environment is

96 well known to impair signal detection and thus communication between animals of different  
97 kind, which may ultimately impose fitness costs (Brumm, 2010; Laiolo, 2010; Read et al.,  
98 2014). Commonly many birds, frogs or insects sing at the same time, and therefore mutually  
99 mask their songs. Background noise produced by conspecifics and other vocalizing animals  
100 will operate as an energetic masker if the masking background noise matches the frequency  
101 spectrum of the signals. Conspecific vocalizations are especially potent maskers since they  
102 match the spectro-temporal structure of a species' communication signals. Other substantial  
103 masking effects are produced by wind moving the vegetation and by anthropogenic noise,  
104 such as traffic noise (Brumm and Slabbekoorn, 2005). For these types of background noise, it  
105 is mainly the signal-to-noise ratio at lower frequencies that interferes with long distance  
106 communication (Langemann and Klump, 2005). Thus we decided to test the discrimination  
107 ability of our experimental birds for distance cues both in a silent condition and in the  
108 masking background noise of a natural dawn chorus. We also seek to understand how  
109 previous experience affects the birds' ability to analyse such cues and whether the number of  
110 signal elements affects the birds' assessment of ranging cues (as is known, for example, for  
111 detection sensitivity, Swets et al. 1959).

112

113 Our study species was the great tit (*Parus major* L.), a common European songbird in which  
114 males defend territories, and that has been shown to respond readily in ranging experiments,  
115 both in the field (McGregor and Krebs, 1984) and in the laboratory (Langemann and Klump,  
116 2005). In the present study, great tits obtained from the field were trained in the laboratory to  
117 discriminate between great tit song elements that had been modified to simulate different  
118 transmission distances. The test signals consisted of phrases (repeated units) that are naturally  
119 found in great tit song and make up the different song types present in natural populations.  
120 Sets of phrases from different song types were parametrically manipulated to show patterns of  
121 reverberation and degradation equivalent to transmission distances of between 5 and 160 m  
122 (here called virtual distances). These "echo patterns" were entirely computer generated and  
123 were not obtained by simple re-recordings from songs broadcast in the field (which  
124 commonly creates unwanted acoustic by-products). The method of signal generation we used  
125 in the present study has been successfully applied in a field study (Naguib et al. 2000) in  
126 which the approach behaviour of territorial chaffinches (*Fringilla coelebs* L.) was related to  
127 the degree of degradation of the playback signals, demonstrating that the birds perceived  
128 differences in degradation as differences in distance of a sound source.

129

130 Many species of songbirds sing different song types and it has been argued that experience  
131 and thus stimulus familiarity might affect a bird's ability to assess the distance of a sound  
132 source (Morton, 1998; Naguib, 1998; Wiley, 1998). Although the motivational context is very  
133 different, when observing a bird in its natural or in the laboratory environment, both  
134 approaches aim to estimate whether birds do make use of specific signal features. For  
135 example, for assessing distance cues of a specific song type it is not necessary that a male  
136 produces this song type itself, it is sufficient if it is heard from a neighbouring male  
137 (McGregor and Avery 1986). Commonly, differences in the behavioural response to degraded  
138 and non-degraded playback songs were found only if they were familiar to the focal male or if  
139 they were very similar to the bird's own song, and little or no difference in response to  
140 playback signals was found for unfamiliar signals (McGregor et al., 1983; Shy and Morton,  
141 1986). A positive effect of stimulus familiarity on auditory processing has also been  
142 demonstrated in a laboratory study (Seeba and Klump, 2009). The European starlings  
143 (*Sturnus vulgaris* L.) were best to perceptually restore the "missing" parts of song signals  
144 when they had prior experience with the signals compared to stimuli they were unfamiliar  
145 with.

146  
147 Patterns of reverberations together with the frequency-dependent attenuation are among the  
148 cues that can be used for ranging. In the present study, we trained great tits to discriminate  
149 between signals with echo patterns representing different virtual distances. We measured the  
150 response latencies of the birds to estimate their discrimination ability. We predicted birds  
151 would be better able to process distance cues for (1) large differences vs. small differences in  
152 virtual distances between signals, (2) signals in the silent condition vs. the dawn chorus  
153 condition, (3) signals with three vs. two elements, and (4) signals from familiar vs. unfamiliar  
154 song types.

155

156

## 157 **Results**

158 In total, the six great tits performed 1075 experimental sessions. From these, 74 sessions were  
159 not valid due to the false alarm rate exceeding the limit, in 129 sessions the rate of correct  
160 responding was too low, and in a few cases the subject did not finish (8 sessions) or technical  
161 dysfunction halted the session (5 sessions). When only valid sessions were taken into account,  
162 the average false alarm rate was 6.2% and the average rate of correctly discriminating echo  
163 variants from the reference was 52.8%. To estimate the birds' discrimination ability, we used  
164 the individuals' response latencies from renditions of any possible reference-test combinations  
165 of the echo variants (see Methods for details). The number of valid averages per bird was  
166 between 240 and 360 (1890 altogether).

167  
168 Neither total element duration nor the pause duration of different song types were associated  
169 with the subjects' response latencies in a multiple regression analysis ( $R^2 = 0.013$ ,  $\beta = -0.117$ ,  
170  $P = 0.27$  and  $\beta = 0.116$ ,  $P = 0.27$  for element duration and pause duration, respectively). We  
171 thus included all song types into the analysis irrespective of element and pause duration. The  
172 results of the GLMM ANOVA (Table 1) showed that the great tits' response latencies were  
173 significantly affected by the background type in which the discrimination task was performed.  
174 On average, response latencies were significantly longer in the dawn chorus condition ( $1483$   
175  $\pm 308$  ms; mean  $\pm$  SD, here and throughout) compared to the silent condition ( $1339 \pm$   
176  $326$  ms). The birds' response latency was also significantly affected by the differences  
177 between the virtual distances. Generally, large differences between echo patterns lead to short  
178 response latencies while small differences lead to long response latencies (Figure 1). In  
179 contrast to the first main effects, the order of presentation had only a minor effect on echo  
180 discrimination. Response latencies to songs presented first in the silent and afterwards in the  
181 dawn chorus condition were slightly longer ( $1420 \pm 315$  ms) compared to songs first  
182 presented in the dawn chorus and then in the silent condition ( $1402 \pm 335$  ms). Neither the  
183 familiarity of the song types nor their element number had a significant effect on response  
184 latencies (Table 1). Bird identity had no effect either.

185  
186 The GLMM ANOVA also revealed three significant interactions (Table 1). The strongest  
187 interaction was found between background type and the order in which the test songs were  
188 presented (Figure 2). Reaction times to test songs that were first presented in the silent  
189 condition were on average rather similar. In contrast, reaction times to test songs first  
190 presented in the dawn chorus condition were shorter in the silent condition than in the dawn

191 chorus condition. The next interaction was between stimulus familiarity and order of  
192 presentation (Figure 3). Mean response latencies for discriminating familiar neighbouring  
193 songs were on average shorter when they were presented first in the dawn chorus condition  
194 compared to when they were first presented in the silent condition. In the case of the birds'  
195 own song this difference was reduced, and it was reversed in the case of unfamiliar songs.  
196 The least significant interaction was the one between background type and the differences  
197 between the virtual distances.

198

199 The one-dimensional solutions of any of the PROXSCAL analyses explained more than 80%  
200 of the dispersion's variance in each of the two background types. The perceptual space  
201 coordinates of the different experimental classes as a function of the virtual distance are  
202 shown in Figure 4. Similar perceptual space coordinates indicate that echo patterns from the  
203 corresponding virtual distances have been perceived as being similar while larger differences  
204 between coordinates indicate that the differences between these echo patterns were perceived  
205 as being more salient. The perceptual distance values (i.e., space coordinates) varied  
206 significantly with virtual distance in both background types (silent condition,  $F=155.55$ ,  
207  $P<0.001$ ; dawn chorus condition,  $F=406.60$ ,  $P<0.001$ ). Posthoc Tukey tests showed that,  
208 within each of the two background types, all comparisons between virtual distances were  
209 significantly different (all  $P < 0.01$ ), except the comparisons between the two shortest (5m  
210 and 10m) and the two longest (80m and 160m) virtual distances. Moreover, the perceptual  
211 space coordinates determined in the silent condition and in the dawn chorus condition were  
212 highly correlated for each of the experimental classes ( $R^2$  values ranged from 0.74 to 0.99),  
213 indicating similar relations between virtual distance and perceptual space coordinates in both  
214 conditions.

215

216

## 217 **Discussion**

218

219 In this study we investigate how background noise interferes with the perception of distance  
220 cues. Working under a controlled laboratory situation, we presented song signals in a realistic  
221 masking situation to trained great tits by employing a natural dawn chorus recording. We used  
222 variants of song signals with an increasing degree of degradation to test how stimulus  
223 familiarity or the number of song elements affected the birds' ability to discriminate between  
224 degraded and undegraded signals. Our results demonstrate that echo patterns simulating the  
225 degradation of song signals for different transmission distances can be discriminated by the  
226 birds. In the introduction we have made four predictions regarding the discrimination of echo  
227 patterns that we are discussing below.

228

### 229 *Echoes indicate transmission distance*

230 Previous field experiments have proven the ranging ability of different bird species by  
231 evoking territorial behaviour in response to conspecific playback song. A male will approach  
232 the sound source in an attempt to localize its presumed rival and the distance covered and its  
233 direction indicate the bird's ranging ability (Holland et al., 2001; Morton et al., 2006; Naguib  
234 et al, 2000; Nelson and Stoddard, 1998). In addition, laboratory experiments allow  
235 quantifying which of the different physical signal cues are behaviourally relevant for a bird  
236 and which can be used at all. In the present study we used sets of signals differing in the  
237 pattern of reverberation and degradation to simulate transmission distances of between 5 and  
238 160 m. In accordance with our first prediction, the great tits indeed perceived echo patterns  
239 from similar distances as being similar, while large differences in virtual distance were more  
240 salient and therefore easier to discriminate. The outcome of the present study was comparable  
241 to previous results from great tits (Langemann and Klump, 2005), but those experiments were  
242 performed in the absence of any background noise. The interaction term between "virtual  
243 distance" and "background type" has a very low F value and seems rather unimportant. Still, it  
244 may indicate that distance cues are more readily available in the silent compared to the dawn  
245 chorus condition, as seen in Figure 1: with increasing difference of virtual distance reaction  
246 times drop slightly faster in the silent than in the dawn chorus condition.

247

248 For discriminating the different echo patterns, our great tits could rely on distance cues based  
249 on reverberation patterns and frequency-dependent attenuation. Since we adjusted all echo  
250 variants to the same rms amplitude, signal amplitude *per se* was not available as a cue.



251 Differences in overall amplitude have indeed been shown to be a possible cue for distance  
252 assessment, both in laboratory studies (Phillmore et al., 1998; Radziwon et al., 2011) and in  
253 the field (Naguib, 1997a; Nelson, 2000). Overall amplitude, however, is not a reliable  
254 distance cue. Acoustic signals can be produced with different amplitude at the source already,  
255 and movements of the singer's head will have an additional effect on signal amplitude (Larsen  
256 and Dabelsteen, 1990; Nelson, 2000). It has been suggested that prior knowledge of the  
257 signal's original spectrum at the sound source is required for employing the typical high-  
258 frequency attenuation of signals as a ranging cue (Naguib and Wiley, 2001). Such a cue may  
259 thus be especially useful for signals being familiar to the subject, as is the case, for example,  
260 for songs used in the interaction between territorial neighbours. Reverberations added to a  
261 signal during transmission should be a reliable distance cue, since the reverberation pattern  
262 will inevitably change with distance. Most of the differences in the perceptual space  
263 coordinates we see in Figure 4 resemble the gradual signal change in relation to increasing  
264 virtual distance.

265

266 So far, only a few studies have tested the behavioural response of territorial birds for more  
267 than two different degrees of degradation (Naguib et al., 2000; Nelson and Stoddard, 1998).  
268 Chaffinches, for example (Naguib et al. 2000), showed a categorial response to playback of  
269 degraded songs corresponding to transmission distances of between 0 and 120m, indicating  
270 that the birds distinguished "short" (0, 20, and 40 m) from "long" distances (80 and 120 m). In  
271 the context of territorial defence it might indeed be adaptive to initially differentiate between  
272 only two categories, thus localizing potential threats either being "inside" or "outside" the  
273 territory. Moreover a bird would most likely include visual information to narrow down the  
274 location of another male. In perceptual terms, however, the present paper clearly shows that  
275 great tits are well able to distinguish between acoustic signals coming from several distances.

276

### 277 *Echo discrimination in background noise*

278 In the wild, songbirds have to localize conspecifics in the ever present acoustic background  
279 noise of their environment (Brumm and Slabbekoorn, 2005; Brumm and Naguib, 2009), with  
280 the dawn chorus likely being one of the acoustically most challenging conditions. Therefore  
281 we had our great tits perform the discrimination task in two conditions, i.e., with and without  
282 background noise, but with the amplitude of the test signals fixed at the same value. We  
283 predicted that echo discrimination in the dawn chorus condition should be impaired compared  
284 to the silent condition. This was indeed the case. The response latencies of the great tits were

285 significantly longer in the dawn chorus condition compared to the silent condition (Figure 1).  
286 These results are in line with previous studies showing that signal discrimination in  
287 background noise deteriorates with decreasing signal-to-noise ratio (Lohr et al., 2003; Pohl et  
288 al., 2012). Since the sound-pressure level of the test signals in our study was set well above  
289 the great tits' masked auditory thresholds (Pohl et al., 2009), we can conclude that energetic  
290 masking *per se* was not the main source for the difference in performance. Still, the noisy  
291 background will interfere with the auditory input to some degree, such that soft parts of the  
292 signals or the reverberation tails added to the signals may be affected. Thus the longer  
293 response latencies in noise indicated that the physical differences between echo variants were  
294 less salient and that the task might have been more demanding in noise compared to the silent  
295 condition (Luce, 1986). The interaction term between "background type" and "order of  
296 presentation" might at first seem inconsistent with this pattern: Great tits first performing the  
297 task in silence had no advantage when later on performing the task in the dawn chorus  
298 (indicating no effect of background type). However, when they were first challenged to work  
299 in the dawn chorus, their performance for the same test songs was much better in silence,  
300 indicates that performance in silence is less demanding for the birds having experienced the  
301 more difficult task first. Apart from the difference in response latency, the scaling analysis  
302 revealed hardly any difference in the discrimination performance between the silent and the  
303 dawn chorus conditions (Figure 4). This indicates that great tits are extremely well adapted to  
304 coping with natural ambient noise. A possible mechanism to outweigh the detrimental effects  
305 imposed by the background noise would be "investing" more time in neuronal computation  
306 for making the decision (for effects of computational load and attention in humans, Muller-  
307 Gass and Schröger, 2007). Such mechanisms may also play a role in field playback  
308 experiments and for perception in real world conditions.

309

### 310 ***Do more elements provide for better echo discrimination?***

311 A study by Holland et al. (1998) showed that the degree of degradation between the different  
312 element types in the song of the wren (*Troglodytes troglodytes*) varied considerably and  
313 resulted in an element-specific pattern of degradation. In that case, more types of song  
314 elements likely offered several independent cues on the degree of degradation and, thus,  
315 together could provide better distance cues. Contrary to our prediction, the great tits did not  
316 benefit from an additional song element and discrimination performance was similar for  
317 signals composed of two or of three elements. This is surprising, since more song elements  
318 will at least support signal detection (Swets et al. 1959) and we expected that more elements

319 would also increase the probability for detecting the relevant distance cues. In comparison to  
320 the wrens (Holland et al., 1998, 2001), which commonly sing many different repeated  
321 elements, great tits use only few element types. They most often sing two-element and three-  
322 element song types. While the two notes of the great tit two-element song types always differ  
323 in their temporal and spectral properties, the three-element song types will frequently include  
324 a repeat of one of the two notes. Following Swets and colleagues, any repeat should improve  
325 the auditory system's sensitivity by the square root of the number of independent  
326 observations. Contrary to that expectation, however, we do not find element number to  
327 improve echo discrimination.

328

### 329 *Echo discrimination as a matter of familiarity*

330 A number of field studies have demonstrated that familiarity with a specific song type will  
331 affect a male's ability to discriminate between degraded and undegraded playback songs and  
332 the ability to assess the distance of a sound source (McGregor et al., 1983; Morton et al.,  
333 2006; Naguib, 1998; Shy and Morton, 1986). However, there are also field studies that did not  
334 find enhanced ranging ability for familiar song types (Wiley and Godard, 1996), and even  
335 unfamiliar sounds can be effectively ranged (Naguib, 1997b). Similarly, black-capped  
336 chickadees (*Poecile atricapillus*) reared in the laboratory and not having experienced adult  
337 vocalization could discriminate between undegraded and degraded songs and calls as well as  
338 birds taken from the wild into the laboratory experiment (Phillmore et al., 2003). In summary,  
339 different studies either do or do not provide evidence for improved distance cue  
340 discrimination with the familiarity of the signals. Our data that we obtained under controlled  
341 laboratory conditions, might thus indicate that stimulus familiarity is not a solid factor for  
342 assessing distances at all.

343

344 One possible reason why we did not find an effect of familiarity on echo discrimination might  
345 relate to our experimental design in which the great tits were "learning" the unfamiliar song  
346 types, thus "unfamiliar" became "familiar" in the course of the experiments. Using an  
347 experimental procedure similar to the present study, Seeba and Klump (2009) demonstrated  
348 that stimulus familiarity affected the ability of European starlings to perceptually restore parts  
349 of song signals that were experimentally replaced by noise. In these experiments a rather  
350 restricted set of previously unfamiliar stimuli were presented so many times that the starlings  
351 could have learned every single stimulus, still the effect of stimulus familiarity remained  
352 suggesting that such learning effects are not an important issue for our present experiments.

353 The significant interaction between "stimulus familiarity" and "order of presentation" also  
354 may relate to the learning issue discussed above, i.e., in the demanding dawn chorus condition  
355 the birds appear to acquire the capability for improving their analysis in the silent condition.  
356 This seems to take the largest effect for the songs of previous neighbours that may still be  
357 familiar to the birds. The mechanism underlying the transfer, however, is unknown.  
358  
359

360 **Methods**

361

362 ***Subjects***

363 Six adult male great tits (*Parus major* L.) were the subjects in our behavioural experiments.  
364 One of these birds had previous experience in detecting tonal or noisy signal elements, the  
365 other five birds were naive. These birds were mist netted prior to or after the breeding season  
366 (as indicated by the construction of a nest) from a woodland population near Oldenburg,  
367 Germany, in 2006 (one individual), 2007 (four individuals), and 2009 (one individual). They  
368 were housed in individual cages of 80 x 40 x 40 cm<sup>3</sup> in a common bird room with at least 14  
369 light hours. In the home cages the birds had unrestricted access to water and were fed with a  
370 diet mainly consisting of sunflower seeds, rolled oats and dried insects. Before the start of an  
371 experimental session, the subjects were deprived of food for about one to four hours, so that  
372 they were motivated to earn food during the experiments. Food rewards during experimental  
373 sessions consisted of pieces of mealworms that are favourite food items. Each bird was tested  
374 five days per week and once or twice a day. The care and treatment of the birds were  
375 approved by the Landesamt für Verbraucherschutz und Lebensmittelsicherheit, Lower  
376 Saxony, Germany. Catching permits were issued by Landkreis Ammerland and by  
377 Vogelwarte Helgoland/Wilhelmshaven, Lower Saxony, Germany. At the end, after about a  
378 year of experimental testing, the birds were released into the woods, at the place where we  
379 had caught them.

380

381 ***Song recordings***

382 Great tit males from the study population were marked with individual combinations of  
383 coloured plastic and an aluminium ring. We specifically recorded the song repertoire of  
384 identified males and the repertoire of their neighbours. We also recorded singing activity from  
385 non-ringed great tits to sample the song type repertoire of the field site. Recordings were  
386 made between 7:00 and 14:00 MEZ from February until April in 2006, 2007, and 2009. To  
387 obtain song types unknown to our study population, we recorded great tit males from  
388 woodland and urban populations at least 7 km away from our field site. Songs were recorded  
389 with a sampling rate of 22.05 kHz using Sennheiser ME88/K3N (Wedemark, Lower Saxony,  
390 Germany) or Sennheiser ME67 unidirectional microphones with foam windshields and a  
391 Marantz PMD670 digital recorder (Longford, Middlesex, UK).

392

393

394 ***Song analysis***

395 Great tits typically group a small number of song elements into phrases that are repeated  
396 several times per song (Lambrechts 1996; Slabbekoorn and den Boer-Visser 2006). Different  
397 song types are distinguished by characteristic temporal and spectral features of their phrases.  
398 The song types found in our great tit population mostly had two or three elements per phrase.  
399 We ignored song types with more than three elements per phrase since these were rarely sung  
400 and recorded. We obtained 108, 324, and 354 two-element song types in 2006, 2007, and  
401 2009, respectively, and we had 19, 60, and 72 three-element song types for analysis in 2006,  
402 2007, and 2009, respectively.

403

404 We defined three levels of familiarity with respect to a tested male: (1) song types derived  
405 from the bird's own song were certainly "familiar" to the bird, (2) "familiar" song types of  
406 neighbouring birds that were dissimilar from the bird's own song, and (3) "unfamiliar" song  
407 types that were not performed in the study population and therefore were dissimilar to both,  
408 own and neighbouring song types.

409

410 Signal features were analysed using Avisoft SASLab Pro software (version 4.52; Avisoft  
411 Bioacoustics, Berlin, Germany; analysis done by N.U.P.). Each year of recording was  
412 analyzed separately. Generally, ten different phrases were measured for each song type,  
413 however, in 27% of the cases fewer than ten phrases could be analyzed. These measures were  
414 also used to evaluate the dissimilarity of song types described below. Phrases were selected  
415 from different positions of a song bout, excluding the first phrase of any song that often  
416 shows shorter element durations or slightly deviant features compared to the following  
417 phrases (Lambrechts and Dhondt, 1987). Phrases suitable for measurements were chosen  
418 based on the sonogram representation (Fourier transformation, 11.6 ms Hamming Window,  
419 256 samples at 22.050 kHz sampling rate, temporal overlap between adjacent spectra  
420 93.75%). Duration measurements were taken from the waveforms. Frequencies and  
421 associated relative signal amplitudes were measured from the logarithmic power spectra of  
422 the song elements (Table 2 and Figure 5 for all measures taken). Since some song elements  
423 include sinusoidal frequency or amplitude modulations, low- and high-frequency side bands  
424 from song elements were inspected to identify those elements.

425

426 To evaluate the dissimilarity of song types we analyzed the signal features extracted from the  
427 different song types with a discriminant function (Method I) and hierarchical cluster analysis

428 (Method II). As a basic statistical assumption, song types from different field recordings were  
429 treated as different song types (and only statistics would show whether song types were  
430 indeed different or similar to each other). We verified the output of these analyses by a  
431 common method of visual classification (Method III). In summary, two song types were  
432 defined as being dissimilar if all three methods of analysis came to a congruent conclusion of  
433 dissimilarity.

434  
435 (**Method I**) A stepwise discriminant function analysis (inclusion based on Wilks' lambda with  
436 F for inclusion of 3.84 and F for removal of 2.71) was applied to identify groups of song types  
437 by means of the discriminant functions obtained from the measures of temporal and spectral  
438 features of each song type (Garson 2012a). We used the first two discriminant functions and  
439 the cross-validated classification tables to distinguish between song types that were similar or  
440 dissimilar to each other. Regarding the two-element song types the first two discriminant  
441 functions accounted for 78.0, 77.2 and 70.5% of the variance in 2006, 2007, and 2009,  
442 respectively. Regarding the three-element song types the first two discriminant functions  
443 accounted for 93.8, 71.6, and 67.8% of the variance in 2006, 2007, and 2009, respectively.  
444 Variables that were included by the discriminant analysis were interpreted as being of high  
445 importance for classifying the song types. Those parameters that were included in the  
446 discriminant function analysis in each of the three years are listed in Table 3 and 4. Song  
447 types were classified as being dissimilar if there was no overlap between the data points of the  
448 scatter plot produced on the basis of the first two discriminant functions.

449  
450 (**Method II**) The hierarchical cluster analysis estimated dissimilarity between objects (song  
451 types) by distance measures (Garson 2012b) obtained using the temporal and spectral features  
452 listed in Table 2. After computing squared Euclidean distance measures based on the z-  
453 transformed variables, clusters were constructed based on the average linkage. We defined all  
454 phrases that were linked in the first step of the clustering process as belonging to the same  
455 song type. Song types not linked in this step were defined as being dissimilar.

456  
457  
458 (**Method III**) Since visual sonogram analyses are known to be quite robust (but see Jones et al.  
459 2001), we compared the groups of song types obtained with the statistical methods with a  
460 classification by sonograms. Sonograms were created using a Fourier transformation  
461 (parameters as stated above, temporal overlap 87.5%). For the visual classification we used



462 (1) the order of high and low frequency elements within a phrase, (2) the peak frequency of  
463 elements, (3) the frequency range and possible frequency modulation of song elements, and  
464 (4) the duration of song elements and inter-element pauses (McGregor and Krebs, 1982).  
465 Song types that appeared clearly different with respect to one of these features were classified  
466 as being dissimilar.

467

#### 468 *Test signals*

469 We selected song types that would allow testing whether discriminating between different  
470 echo patterns was affected by both the familiarity of a song type and by the number of its  
471 elements. When selecting the experimental stimuli, song types were chosen based on the  
472 classification in the song analysis described above and with respect to the subjects' former  
473 territorial neighbours in the wild. First, the bird's own songs were inspected, then song types  
474 from its neighbours were selected in a way that they were most different from the own song.  
475 Thereafter, unfamiliar song types were chosen to be as dissimilar as possible from all song  
476 types of the study population sung in the year the experimental bird was removed from the  
477 woods. Generally two song types were selected for each level of familiarity (Table 5), both  
478 for two- and three element song types.

479

480 Test signals consisted of a single phrase of a specific song type and with a specific echo  
481 pattern. Different echo variants were synthesized as follows: For each song type six to ten  
482 phrases from recordings with a good signal-to-noise ratio were selected and the frequency and  
483 amplitude contours of each song element were sampled every 1.451 ms (using Avisoft  
484 SASLab Pro). The frequency and amplitude contours as well as the element and pause  
485 durations of all phrases measured from a specific song type were then averaged to form a  
486 "standard" of this song type. These standards were run through a computer simulated virtual  
487 forest (programmed by G. Klump, Matlab, The Mathworks Inc., Natick, MA, USA) in order  
488 to impose reverberation at the stimuli, equivalent to sound transmission distances of 5, 10, 20,  
489 40, 80, and 160 m (we call these distances "virtual distances" throughout the paper). These  
490 distance fit well to the territory size of many great tits at our study site. Details of the  
491 procedure can be found elsewhere (Naguib et al. 2000). Briefly, the program simulated a two-  
492 dimensional forest of 500 x 600 m with 12 000 tree trunks that, on average, were spaced 5 m  
493 apart. "Loudspeakers" and "microphones" were virtually placed at random positions within  
494 the forest to simulate the denoted distances. Broadcast signals were reflected once from each  
495 tree, attenuating the sound by 10 dB in order to simulate loss of sound energy by absorption



496 and scattering of the sound wave. In addition, sound was attenuated according to the 6 dB  
497 spherical loss rule as well as at 10 dB/100 m excess attenuation (Marten and Marler, 1977;  
498 Morton, 1975). To simulate effects of frequency-dependent attenuation a 128 point FIR filter  
499 was used to represent the excess attenuation found in deciduous forests (Marten and Marler,  
500 1977). The different echo variants obtained for all test signals were adjusted to the same root  
501 mean square (rms) amplitude and were presented in the behavioural experiments with a sound  
502 pressure level (SPL) of 58.5 dB(C).

503

#### 504 *Dawn chorus masker*

505 In order to study how echo discrimination was affected by background noise, test signals were  
506 presented both in a "silent condition" and in a "dawn chorus condition" consisting of a  
507 recording from natural dawn chorus. The dawn chorus was a sample of 4.6 min recorded in a  
508 deciduous forest in the UK (Treswell Wood, Nottinghamshire; sample rate 44.1 kHz; Sony  
509 DAT recorder TCD-D8, Sony Europe Ltd., Weybridge, UK; Sennheiser ME20 microphone,  
510 Wedemark, Germany). We chose this recording as the masker because it was free of any great  
511 tit vocalizations and of anthropogenic noise. Hanning ramps (10 ms) were imposed at the start  
512 and the end of the sound file to obtain a loop file without sudden level changes. In the  
513 experiment, the file was played as a continuous masker at a natural sound pressure level of  
514 58.5 dB(C) SPL (equivalent continuous sound pressure level, Leq). Figure 6A depicts an  
515 arbitrary 10 s example out of the dawn chorus waveform. Figure 6B shows the power  
516 spectrum density of the complete 4.6 min masker file, i.e. the median, first and third quartiles,  
517 and the minimum and maximum amplitude values occurring in the analysis frames. The  
518 frequency spectra were calculated using a 100 ms frame size without overlap and without  
519 weighting window. Due to the irregular pattern of the singing birds on the recording, the  
520 spectral characteristics of the dawn chorus file and the signal-to-noise ratio in the  
521 discrimination task were constantly changing during an experimental session. In the  
522 experiments, the birds triggered the onset of the test stimulus playback themselves (see  
523 Procedure of operant testing), thus providing a unique masking situation for any replicate  
524 signal exposure.

525

#### 526 *Experimental setup*

527 The great tits were moved from their home cages to the experimental cage using a small  
528 transfer cage. The experimental cage (26 x 22 x 30 cm<sup>3</sup>) was located within a sound-  
529 attenuating echo-reduced chamber (sound-absorbing foam by Illbruck GmbH, Leverkusen,

530 Germany; cutoff frequency 500 Hz,  $\alpha > 0.99$ ; total attenuation: 48 dB at 500 Hz,  $> 57$  dB for  
531 frequencies  $\geq 1$  kHz). At the front of the cage two response keys (observation key, report key)  
532 with light-emitting diodes (LEDs) were attached. Below the response keys an automatic  
533 rotary food dispenser was placed. Test signals and dawn chorus masker were played from two  
534 separate channels of the computer sound card (Sound Blaster PCI 512 16 bit, 44.1 kHz  
535 sampling rate). They were independently adjusted in level by computer-controlled attenuators  
536 (TDT PA4; Tucker-Davies Technologies, Alachua, FL, USA). Both channels were added in  
537 the input stage of the amplifier (Yamaha A-520, Nippon Gakki, Japan) driving the speaker  
538 (Canton Twin 700, 200-9000 Hz,  $\pm 2.5$  dB; Canton Elektronik GmbH & Co. KG, Weilrod,  
539 Germany) that was mounted above the experimental cage. All behavioural protocols were  
540 controlled by a Linux-operated microcomputer. The behaviour of the birds was video  
541 monitored. Sound levels were calibrated at least once per day (Brüel & Kjær 2238 Mediator,  
542 Nærum, Denmark) by placing a microphone (Brüel & Kjær 4188 microphone) at the bird's  
543 usual head position.

544

#### 545 ***Procedure of operant testing***

546 The great tits were trained in a Go/NoGo procedure to discriminate the test signals from a  
547 repeated reference signal. The reference signal was one of the six echo variants of a test signal  
548 and was repeated every 1.3s. The remaining five echo variants served as the test signals. In  
549 one experimental session (of about 40 min) the bird had to complete a series of trials. Each  
550 trial started with a peck by the bird at the observation key. After a random time interval of  
551 between 2 to 10 s, the next peck at the observation key lead to the replacement of the repeated  
552 reference signal by a test signal. The random presentation scheme is a suitable method to  
553 prevent an animal "predicting" time periods with a high probability of test signals. If the bird  
554 pecked the report key within 2000 ms after the onset of the test signal (Go response), this was  
555 scored as a "hit", and a food reward was given with a probability of between 70 and 80%.  
556 This reinforcement mode ensures high motivation and constant rates of responding. A feeder  
557 light was always presented as a secondary reinforcement. If the subject did not report a test  
558 signal within the given response time (NoGo response), this was scored as a "miss". To obtain  
559 a measure of spontaneous responding (the false alarm rate), we employed "catch trials" during  
560 which the reference signal was continued and no test signal was played. NoGo behaviour in a  
561 catch trial was scored as "correct rejection". A Go response during a catch trial or during the  
562 random time interval resulted in a black-out period of 5 to 30 s. In a Go/NoGo procedure a  
563 proportion of 50% correct responses is significantly higher than the random performance

564 estimated by the false-alarm rate in our study. To prevent any training effect, the sequence of  
565 presentation of the song types was randomized. Moreover, half of the song types (one of the  
566 two from each level of familiarity, Table 5) were first presented in the silent condition and  
567 thereafter in the dawn chorus condition, for the other half it was *vice versa*.

568

### 569 ***Measuring the discrimination ability***

570 To measure the birds' discrimination ability, we used principles of multidimensional scaling  
571 procedures (Arabie et al. 1978). We recorded the birds' response latencies comparing all  
572 possible reference-test combinations of the echo variants of a specific song type. Short  
573 response latencies indicated salient differences whereas long response latencies indicated that  
574 signals were perceived as being similar (Dooling and Okanoya, 1995). Any possible  
575 combination was presented ten times, and the individuals' averaged response latencies from  
576 these ten renditions were the unit of analysis. Since each song type was available with six  
577 echo variants and each of them had to serve as the reference signal once, the birds had to  
578 complete six sessions per song type. In one session (60 trials) test signals were presented in  
579 randomized order and each test signal was compared ten times against the reference signal  
580 selected for that session, resulting in a matrix of averaged response latencies. Response  
581 matrices were obtained in a factorial design (2 background type x 2 element number x 2 order  
582 of presentation x 3 familiarity of song type x 15 virtual distance). For "bird's own song", three  
583 subjects had only one three-element song type, and one bird had no three-element song type,  
584 resulting in different numbers of valid averages for the different birds. Because of time  
585 limitation, one subject was not tested with its own song. If the subject failed to respond to the  
586 test signal, the response latency was set to the maximum response time (2000 ms). Sessions  
587 with a false alarm rate of more than 20% or with a total response rate to deviating test signals  
588 of less than 33.3% were discarded and repeated at the end of the experiments.

589

### 590 ***Data analysis***

591 Since the duration of elements and pauses were quite different between song types, we  
592 considered possible effects of element or pause duration on response latencies. We applied a  
593 multiple regression analysis to investigate the association between the average response  
594 latencies of the subjects and the total element (all elements of a phrase) and pause durations  
595 (all pauses of a phrase) for each of the test songs.

596

597 We then explored the birds' ability to discriminate between echo patterns by means of a  
598 general linear mixed model analysis of variance (GLMM ANOVA). The dependent variable  
599 consisted of the birds' mean response latencies. Independent variables were the background  
600 type (silent condition, dawn chorus condition), the level of familiarity of the song types (bird's  
601 own song, songs of neighbouring birds, unfamiliar songs), the element number of the song  
602 types (two element per phrase, three element per phrase), the order of presentation (first in  
603 silence, first in dawn chorus), and the differences between all virtual distances (i.e., 5m, 10m,  
604 15m, 20m, 30m, 35m, 40m, 60m, 70m, 75m, 80m, 120m, 140m, 150m, 155m). Bird identity  
605 was included as a random variable to test for potential differences between individuals. In the  
606 result table we provide all main effects, and from the two-way interactions we present only  
607 those that turn out to be significant. We do not provide interactions higher than two-way since  
608 higher-order interactions are generally rather difficult to interpret.

609  
610 Furthermore the response matrices of the birds describing the response latencies were  
611 analyzed using the PROXSCAL algorithm (Commaneur and Heiser, 1993). This produced  
612 one-dimensional object spaces and provided a measure of perceived similarity between the  
613 echo patterns. Generally, response latencies decrease when stimulus differences get more  
614 salient. The proximity between the coordinates obtained within the perceptual space was then  
615 inspected for significant differences by a 1-way ANOVA for each of the two background  
616 types, with virtual distance (i.e., 5m, 10m, 20m, 40m, 80m, 160m) being the independent  
617 variable. To compare the representation of virtual distances between background types, we  
618 correlated the perceptual distance values (i.e., the space coordinates) determined in the silent  
619 and in the dawn chorus condition for each of the song stimuli defined by the experimental  
620 classes. The experimental stimulus classes are listed in Table 5, they are based on a  
621 combination of the level of familiarity with the song type, the number of elements in the song  
622 type and the order of presentation in the experiments. All statistical analyses were performed  
623 using the software package SPSS 18 or 21 (SPSS Inc, Chicago, IL, USA).

624  
625

626 **Author contribution and conflict of interest**

627 Experiments were designed by Georg Klump. Nina Pohl conducted or supervised data  
628 collection. Data analysis and manuscript preparation were performed by all three authors. No  
629 competing interests are declared.

630

631

632 **Acknowledgements**

633 Susanne Groß und Annika Horn participated in data collection. Rainer Beutelmann supported  
634 our data analysis. The numerous comments of our anonymous reviewers were extremely  
635 helpful to improve our paper - thanks to all of you!

636

637 **Funding**

638 This study was supported by the Deutsche Forschungsgemeinschaft (SFB TRR 31).

639

640

641 **References**

642

643 **Arabie, P., Carroll, J. D. and DeSarbo, W. S.** (1987). *Three-way multidimensional scaling*  
 644 *and related techniques*. Newbury Park, CA: Sage.

645 **Brumm, H.** (2010). Anthropogenic noise: Implications for conservation. In *Encyclopedia of*  
 646 *Animal Behavior* (eds M. D. Breed and J. Moore), Vol 1, pp. 89-93. Oxford: Academic  
 647 Press.

648 **Brumm, H. and Slabbekoorn, H.** (2005). Acoustic communication in noise. *Adv. Study*  
 649 *Behav.* **35**, 151-209.

650 **Brumm, H. and Naguib, M.** (2009) Environmental acoustics and the evolution of bird song.  
 651 *Adv. Study Behav.* **40**, 1-33.

652 **Collins, S.** (2004). Vocal fighting and flirting: the functions of birdsong. In *Nature's music:*  
 653 *the science of birdsong* (ed. P. Marler and H. Slabbekoorn), pp. 39-79. San Diego:  
 654 Elsevier Academic Press.

655 **Commaneur, J. J. F. and Heiser W. J.** (1993). Mathematical derivations in the proximity  
 656 scaling (PROXSCAL) of symmetric data matrices. Research Report No. RR 93-04,  
 657 Department of Data Theory, University of Leiden.

658 **Dooling, R. J. and Okanoya, K.** (1995). Psychophysical methods for assessing perceptual  
 659 categories. In *Methods in Comparative Psychoacoustics* (ed G. M. Klump, R. J. Dooling,  
 660 R. R. Fay and W. C. Stebbins), pp. 307-318. Basel: Birkenhäuser.

661 **Garson, G. D.** (2012a). *Discriminant Function Analysis*. Asheboro, NC: Statistical  
 662 Associates Publishers.

663 **Garson, G. D.** (2012b). *Cluster analysis*. Asheboro, NC: Statistical Associates Publishers.

664 **Holland, J., Dabelsteen, T., Pedersen, S. B. and Larsen, O. N.** (1998). Degradation of wren  
 665 *Troglodytes troglodytes* song: Implications for information transfer and ranging. *J.*  
 666 *Acoust. Soc. Am.* **103**, 2154-2166.

667 **Holland, J., Dabelsteen, T., Bjørn, C. P. and Pedersen, S. B.** (2001). The Location of  
 668 ranging cues in wren song: Evidence from calibrated interactive playback experiments.  
 669 *Behav.***138**, 189-206.

670 **Jones, A. E., ten Cate, C. and Bijleveld, C. C. J. H.** (2001). The interobserver reliability of  
 671 scoring sonagrams by eye: a study on methods, illustrated on zebra finch songs. *Anim.*  
 672 *Behav.* **62**, 791-801.

673 **Laiolo, P.** (2010). The emerging significance of bioacoustics in animal species conservation.  
 674 *Biol. Conserv.*, **143**, 1635-1645.

- 675 **Lambrechts, M. M.** (1996). Organization of birdsong and constraints on performance. In  
 676 *Ecology and Evolution of Acoustic Communication in Birds* (ed. D. E. Kroodsma and E.  
 677 H. Miller), pp. 305-320. Ithaca NY: Cornell University Press.
- 678 **Lambrechts, M. M. and Dhondt, A. A.** (1987). Differences in singing performance between  
 679 male great tits. *Ardea* **75**, 43-52.
- 680 **Langemann, U. and Klump, G. M.** (2005). Perception and acoustic communication  
 681 networks. In *Animal Communication Networks* (ed. P. K. McGregor), pp. 451–480.  
 682 Cambridge: Cambridge University Press.
- 683 **Larsen, O. N. and Dabelsteen, T.** (1990). Directionality of blackbird vocalization.  
 684 Implications for vocal communication and its further study. *Ornis Scand.* **21**, 37-35.
- 685 **Lohr, B., Wright, T. F. and Dooling, R. J.** (2003). Detection and discrimination of natural  
 686 calls in masking noise by birds: estimating the active space of a signal. *Anim. Behav.* **65**,  
 687 763-777.
- 688 **Luce, R. D.** (1986). *Response times: their role in inferring elementary mental organization*  
 689 (Vol. 8). New York: Oxford University Press.
- 690 **Marten, K. and Marler, P.** (1977). Sound-transmission and its significance for animal  
 691 vocalization. I. Temperate habitats. *Behav. Ecol. Sociobiol.* **2**, 271–290.
- 692 **McGregor, P. K. and Krebs, J. R.** (1982). Song types in a population of the great tits (*Parus*  
 693 *major*): Their distribution, abundance and acquisition by individuals. *Behaviour* **79**, 126-  
 694 152.
- 695 **McGregor, P. K. and Krebs, J. R.** (1984). Sound degradation as a distance cue in great tit  
 696 (*Parus major*) song. *Behav. Ecol. Sociobiol.* **16**, 49-56.
- 697 **McGregor, P. K. and Avery M. I.** (1986). The unsung songs of great tits (*Parus major*):  
 698 learning neighbour's songs for discrimination. *Behav. Ecol. Sociobiol.* **18**, 311-316.
- 699 **McGregor, P. K., Krebs, J. R. and Ratcliffe, L. M.** (1983). The reaction of great tits (*Parus*  
 700 *major*) to playback of degraded and undegraded songs: The effect of familiarity with the  
 701 stimulus song type. *Auk* **100**, 898-906.
- 702 **Morton, E. S.** (1975). Ecological sources of selection on avian sounds. *Am. Nat.* **109**, 17-34.
- 703 **Morton, E.S.** (1986). Predictions from the ranging hypothesis for the evolution of long  
 704 distance signals in birds. *Behaviour* **99**, 65-86.
- 705 **Morton, E. S.** (1998). Degradation and signal ranging in birds: memory matters. *Behav. Ecol.*  
 706 *Sociobiol.* **42**, 135-137.
- 707 **Morton, E. S., Howlett, J., Kopysh, N. C. and Chiver, I.** (2006). Song ranging by  
 708 incubating male Blue-headed Vireos: the importance of song representation in repertoires



- 709 and implications for song delivery patterns and local/foreign dialect discrimination. *J.*  
710 *Field Ornithol.* **77**, 291-301.
- 711 **Muller-Gass, A. and Schröger, E.** (2007). Perceptual and cognitive task difficulty has  
712 differential effects on auditory distraction. *Brain Res.* **1136**, 169-177.
- 713 **Naguib, M.** (1997a). Use of song amplitude for ranging in Carolina wrens, *Thryothorus*  
714 *ludovicianus*. *Ethology* **103**, 723-731.
- 715 **Naguib, M.** (1997b). Ranging of songs in Carolina wrens: effects of familiarity with the song  
716 type on use of different cues. *Behav. Ecol. Sociobiol.* **40**, 385-393; Erratum in *Behav.*  
717 *Ecol. Sociobiol.* **41**, 203.
- 718 **Naguib, M.** (1998). Perception of degradation in acoustic signals and its implications for  
719 ranging. *Behav. Ecol. Sociobiol.* **42**, 139-142.
- 720 **Naguib, M. and Wiley, R. H.** (2001). Estimating the distance to a source of sound:  
721 mechanisms and adaptations for long-range communication. *Anim. Behav.* **62**, 825-837.
- 722 **Naguib, M., Klump, G. M., Hillmann, E., Griebmann, B. and Teige, T.** (2000).  
723 Assessment of auditory distance in a territorial songbird: accurate feat or rule of thumb?  
724 *Anim. Behav.* **59**, 715-721.
- 725 **Nelson, B. S.** (2000). Avian dependence on sound pressure level as an auditory distance cue.  
726 *Anim. Behav.* **59**, 57-67.
- 727 **Nelson, B. S. and Stoddard, P. K.** (1998). Accuracy of auditory distance and azimuth  
728 perception by a passerine bird in natural habitat. *Anim. Behav.* **56**, 467-477.
- 729 **Phillmore, L. S., Sturdy, C. B. and Weisman, R. G.** (2003). Does reduced social contact  
730 affect discrimination of distance cues and individual vocalizations? *Anim. Behav.* **65**,  
731 911-922.
- 732 **Phillmore, L. S., Sturdy, C. B., Ramsay, S. M. and Weisman, R. G.** (1998). Discrimination  
733 of auditory distance cues by black-capped chickadees (*Poecile atricapillus*) and zebra  
734 finches (*Taeniopygia guttata*). *J. Comp. Psychol.* **112**, 282-291.
- 735 **Pohl, N. U., Slabbekoorn, H., Klump, G. M. and Langemann, U.** (2009). Effects of signal  
736 features and environmental noise on signal detection in the great tit, *Parus major*. *Anim.*  
737 *Behav.*, **78**, 1293-1300.
- 738 **Pohl N. U., Leadbeater, E., Slabbekoorn, H., Klump, G. M. and Langemann, U.** (2012).  
739 Great tits in urban noise benefit from high frequencies in song detection and  
740 discrimination. *Anim. Behav.*, **83**, 711-721.



- 741 **Radziwon, K. E., Welch, T. E., Cone, J. P. and Dent, M. L.** (2011). Identification of  
742 auditory distance cues by zebra finches (*Taeniopygia guttata*) and budgerigars  
743 (*Melopsittacus undulatus*). *J. Acoust. Soc. Am.* **129**, 3384-3392.
- 744 **Read, J., Jones, G. and Radford, A. N.** (2014). Fitness costs as well as benefits are  
745 important when considering responses to anthropogenic noise. *Behav. Ecol.*, **25**, 4-7.
- 746 **Seeba, F. and Klump, G. M.** (2009). Stimulus familiarity affects perceptual restoration in the  
747 European starling (*Sturnus vulgaris*). *PLoS ONE* **4**, e5974.
- 748 **Shy, E. and Morton, E. S.** (1986). The role of distance, familiarity, and time of day in  
749 Carolina wrens responses to conspecific songs. *Behav. Ecol. Sociobiol.* **19**, 393-400.
- 750 **Slabbekoorn, H. and den Boer-Visser, A.** (2006). Cities change the songs of birds. *Curr.*  
751 *Biol.* **16**, 2326-2331.
- 752 **Swets, J. A., Shipley, E. F., McKey, M. J. and Green, D. M.** (1959). Multiple observations  
753 of signals in noise. *J. Acoust. Soc. Am.* **31**, 514-521.
- 754 **Wiley R. H.** (1998). Ranging reconsidered. *Behav. Ecol. Sociobiol.* **42**, 143-146.
- 755 **Wiley, R. H. and Richards, D. G.** (1982). Adaptations for acoustic communication in birds:  
756 sound transmission and signal detection. In *Evolution and ecology of acoustic*  
757 *communication in birds, vol I.* (ed. D. E. Kroodsma and E.H. Miller), pp 131-181. New  
758 York: Academic Press.
- 759 **Wiley, R. H., Godard, R.** (1996). Ranging of conspecifics by Kentucky warblers and its  
760 implications for interactions of territorial males. *Behaviour* **133**, 81-102.
- 761
- 762

763 **Tables**

764 **Table 1:** Results of a GLMM ANOVA with the response latencies of six great tit subjects as  
 765 the dependent variable. Shown are main effects and significant two-way interactions.

766

| <b>Source of variation</b>              | <b>d.f.</b> | <b>F-value</b> | <b>P-value</b> |
|-----------------------------------------|-------------|----------------|----------------|
| Background type                         | 1, 1848     | 234.446        | < <b>0.001</b> |
| Familiarity                             | 2, 1850     | 0.592          | 0.553          |
| Element number                          | 1, 1848     | 0.098          | 0.755          |
| Order of presentation                   | 1, 1848     | 4.694          | <b>0.030</b>   |
| Virtual distance                        | 14, 1848    | 165.056        | < <b>0.001</b> |
| Background type X Order of presentation | 1, 1848     | 21.961         | < <b>0.001</b> |
| Background type X Virtual distance      | 14, 1848    | 1.990          | <b>0.015</b>   |
| Familiarity X Order of presentation     | 2, 1848     | 10.117         | < <b>0.001</b> |

767

768

769 **Table 2:** Signal features measured for song type analysis. Duration was measured in seconds,  
 770 frequency in Hertz, and amplitudes in decibel. In a two-element song type two elements and  
 771 the inter-element pause were measured, in a three-element song type all three elements and  
 772 two inter-element pauses were measured. The last six parameters in the list only apply to song  
 773 elements exhibiting sinusoidal frequency or amplitude modulations.  
 774

| <b>Signal feature</b>                 | <b>Abbreviation</b>    |
|---------------------------------------|------------------------|
| Total phrase duration                 | $\Delta t$ total       |
| Pause duration                        | pause                  |
| Element duration                      | $\Delta t$ E1 (E2, E3) |
| Start frequency *                     | f start                |
| End frequency                         | f end                  |
| Peak frequency                        | peak f                 |
| Peak frequency amplitude              | peak f A               |
| Minimum frequency*                    | min f                  |
| Frequency bandwidth*                  | f bw                   |
| Total minimum frequency*              | total min f            |
| Total frequency bandwidth*            | total f bw             |
| Frequency of low-frequency side band  | f LF                   |
| Amplitude of low-frequency side band  | A LF                   |
| Centre frequency                      | CF                     |
| Centre frequency amplitude            | CF A                   |
| Frequency of high-frequency side band | f HF                   |
| Amplitude of high-frequency side band | A HF                   |

775 \*10 dB below peak amplitude

776

777

778 **Table 3:**  
 779 Variables from two-element song types that were included by the discriminant function  
 780 analysis in all three years of recording. The variables were obtained from discriminant  
 781 analyses performed separately for each of the three years. The list thus depicts not the  
 782 complete collection of variables but the set of variables that were important in all three years.  
 783

| Element   | Parameter                             |
|-----------|---------------------------------------|
| Element 1 | Minimum frequency*                    |
|           | Total minimum frequency*              |
|           | Frequency of low-frequency side band  |
|           | Centre frequency                      |
|           | Frequency of high-frequency side band |
|           | Amplitude of high-frequency side band |
| Element 2 | Start frequency                       |
|           | End frequency                         |
|           | Minimum frequency*                    |
|           | Total frequency bandwidth*            |
|           | Total minimum frequency*              |

784 \*10 dB below peak amplitude

785

786

787 **Table 4:**  
 788 Variables from three-element song types that were included by the discriminant function  
 789 analysis in all three years of recording. The variables were obtained from discriminant  
 790 analyses performed separately for each of the three years. The list thus depicts not the  
 791 complete collection of variables but the set of variables that were important in all three years.  
 792

| Element   | Parameter                            |
|-----------|--------------------------------------|
| Element 1 | Duration                             |
|           | End frequency                        |
| Pause 1   | Duration                             |
| Element 2 | End frequency                        |
|           | Centre frequency                     |
|           | Frequency of low-frequency side band |
|           | Amplitude of low-frequency side band |
| Element 3 | End frequency                        |
|           | Total minimum frequency*             |
|           | Centre frequency                     |
|           | Frequency of low-frequency side band |
|           | Amplitude of low-frequency side band |

793 \*10 dB below peak amplitude

794

795

796 **Table 5:** The experimental stimulus classes presented to the birds were based on a  
 797 combination of familiarity, song type, and background type. The level of stimulus familiarity  
 798 was defined with respect to each individual male and the sequence of presentation was  
 799 randomized for each bird. Song types contained either two or three elements per phrase. In  
 800 addition, the order of presentation of the song types was systematically varied: Half of the  
 801 song types were presented first in the silent (S) and then in the dawn chorus (D) condition, the  
 802 other half were first presented in the dawn chorus condition and then in the silent condition  
 803 (D-S).

804

|                      | birds own<br>song types (familiar) | neighbouring<br>song types (familiar) | unfamiliar<br>song types |
|----------------------|------------------------------------|---------------------------------------|--------------------------|
| 2-element song types | S-D / D-S                          | S-D / D-S                             | S-D / D-S                |
| 3-element song types | S-D / D-S                          | S-D / D-S                             | S-D / D-S                |

805

806

807

## 808 **Figure Legends**

809 Figure 1: The experimental stimuli consisted of sets of songs showing patterns of  
810 reverberation and degradation equivalent to transmission distances (or "virtual distances") of  
811 between 5 and 160 m. The panels show mean response latencies (mean  $\pm$  SE) of the six birds  
812 as a function of the difference in virtual distance. Since all echo variants for each virtual  
813 distance served as the reference signal, the different panels depict results for comparisons of  
814 the response for each of the virtual reference distance separately (i.e., re 5 m, re 10 m, re  
815 20 m, re 40 m, re 80 m).

816

817 Figure 2: Bars indicate the response latencies of six birds (mean  $\pm$  SE) as a function of  
818 background type (silent condition, dawn chorus condition) with order of presentation as the  
819 parameter. Songs were presented either first in the silent condition and thereafter in the dawn  
820 chorus condition or *vice versa*.

821

822 Figure 3: Bars indicate response latencies of six birds (mean  $\pm$  SE) as a function of stimulus  
823 familiarity of the test songs (bird's own song, neighbouring song, unfamiliar song) with order  
824 of presentation as the parameter. Songs were presented either first in the silent condition and  
825 thereafter in the dawn chorus condition or *vice versa*.

826

827 Figure 4: One-dimensional space coordinates of the PROXSCAL scaling analyses as a  
828 function of virtual distance (N=6 birds). The proximity of the data points in the object space  
829 provides a measure of perceived dissimilarity between the different signal patterns. Different  
830 lines represent the experimental classes described in Table 5. Experimental stimulus classes  
831 were arranged in a 3x2x2 design, with level of familiarity (bird's own song, neighbouring  
832 song, unfamiliar song), number of elements (2-element song types, 3-element song types) and  
833 order of presentation (presented first in silence, first in dawn chorus) as the factors. Panel (A)  
834 shows space coordinates in the silent condition, panel (B) in the dawn chorus condition. In  
835 each of the panels, the line with open circles represents the mean values.

836

837 Figure 5: Signal description and signal analysis. Great tits group a small number of song  
838 elements (here E1, E2) into phrases that are repeated several times per song. Although  
839 duration measurements were taken from the waveforms, they are illustrated here on the  
840 spectrogram of a two-element song type (panel A). Frequencies and associated relative signal  
841 amplitudes were measured from the logarithmic power spectra of the song elements. Panel

842 (B) depicts a power spectrum from element E2 shown in the upper panel; the threshold for  
843 some of the parameters was set 10 dB below the peak amplitude. See Table 2 for full list of  
844 signal parameters, together with their abbreviation.

845

846 Figure 6: Description of the dawn chorus masker. Panel (A) displays a 10 s example of the  
847 dawn chorus' waveform (total duration of the natural dawn chorus recording was 4.6 min).

848 Panel (B) shows the frequency spectrum. The three middle lines represent the median (bold)  
849 of the power spectrum density and the first and third quartiles (dashed) while the upper and  
850 lower lines in the graph give the minimum and maximum amplitude values, respectively.

851



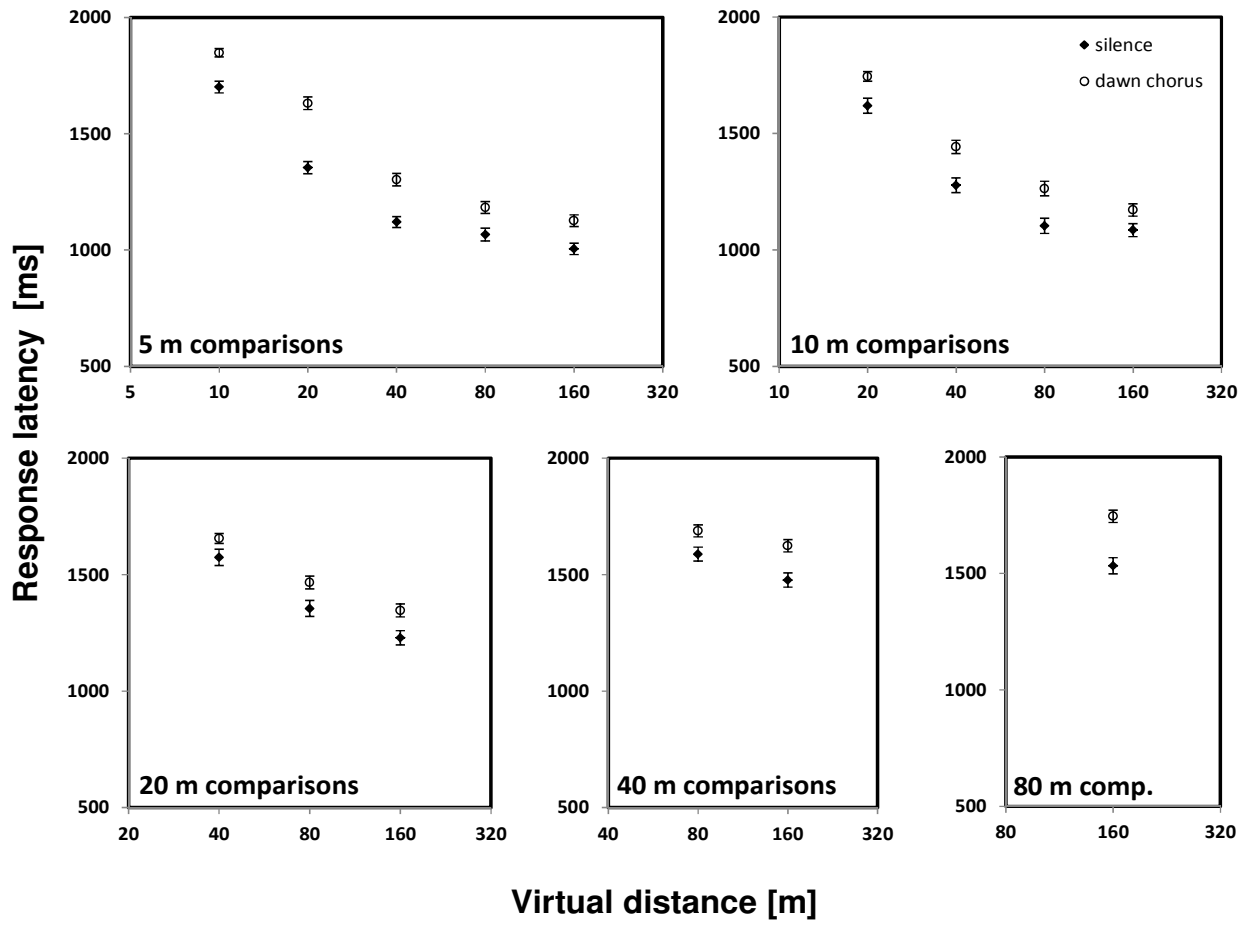

Figure 1

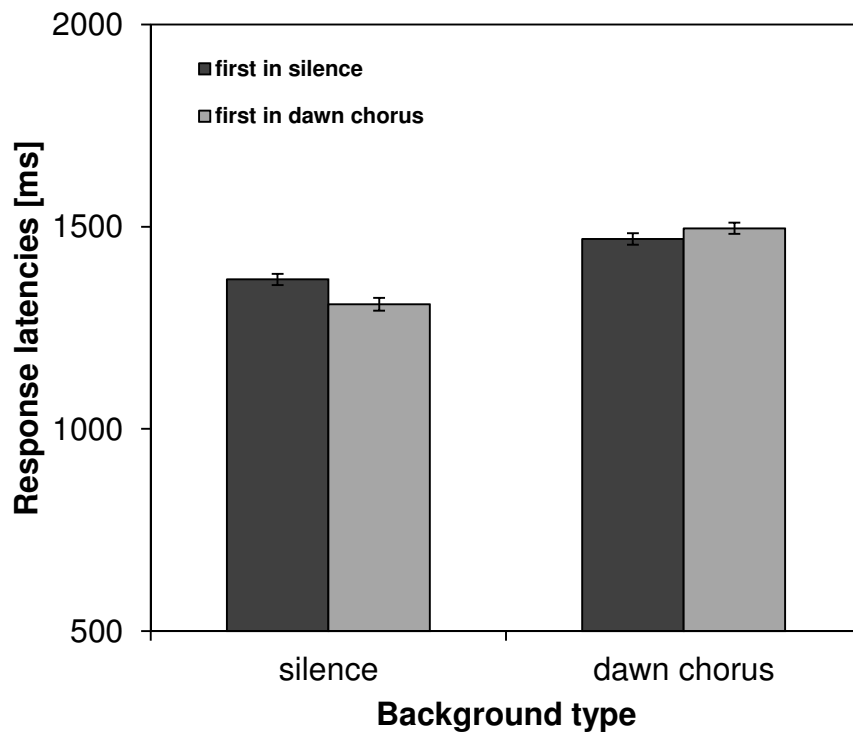

Figure 2

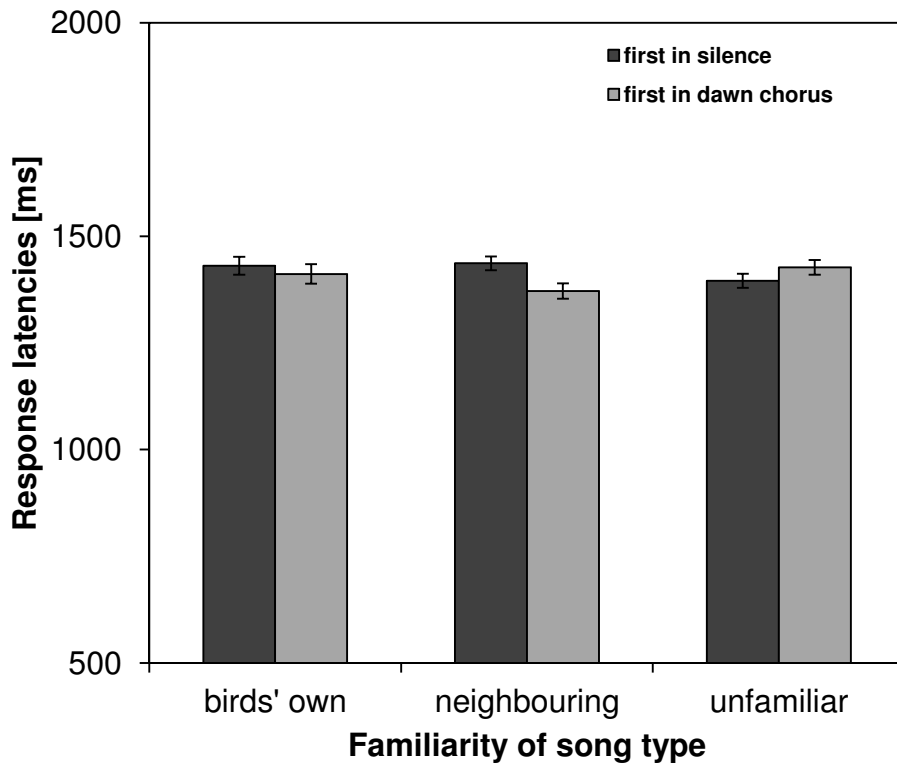

Figure 3

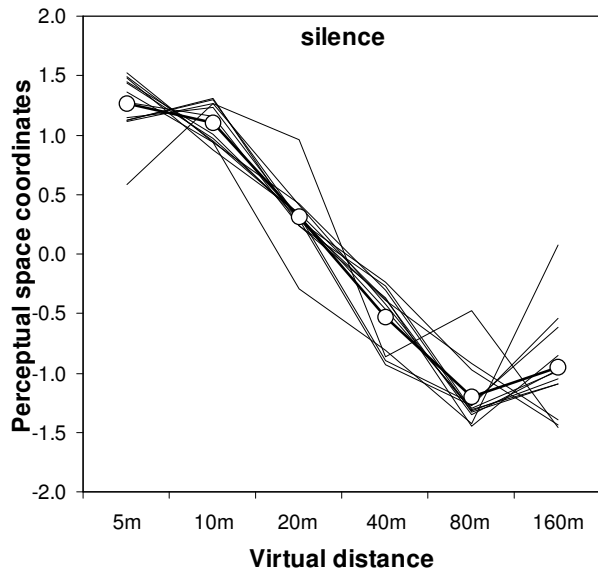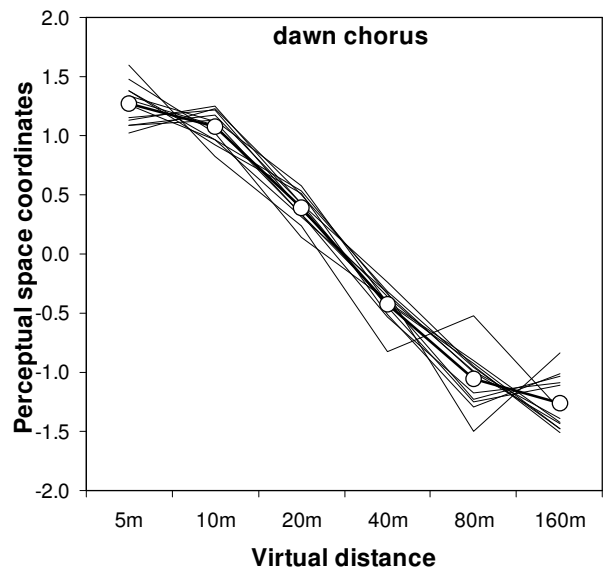

Figure 4

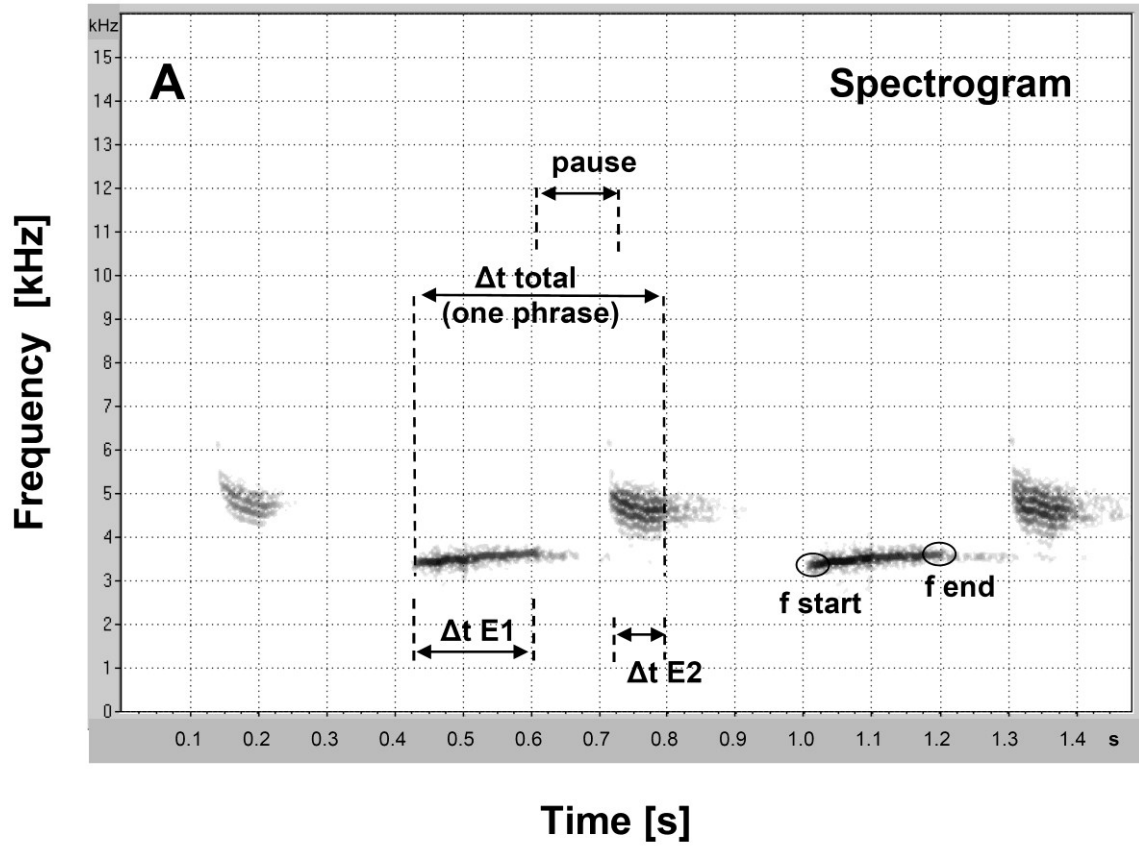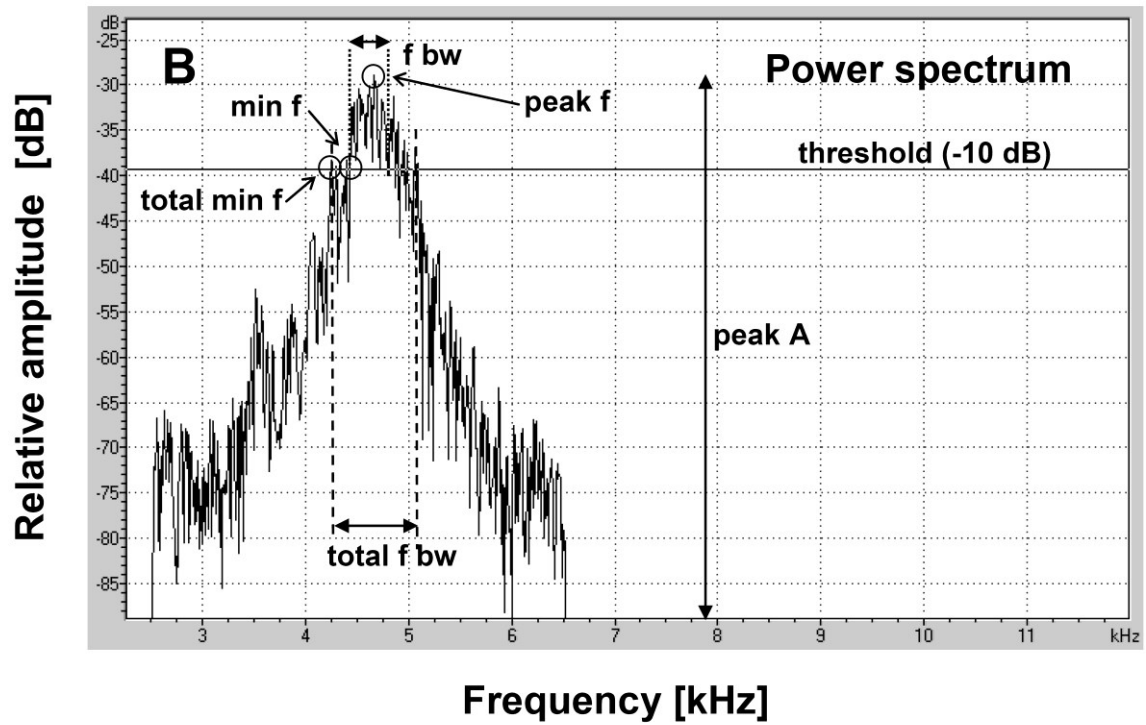

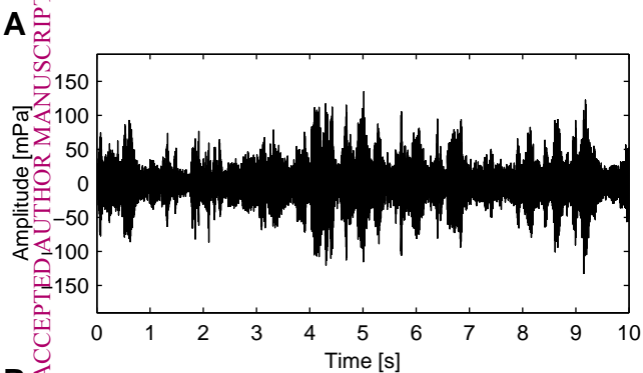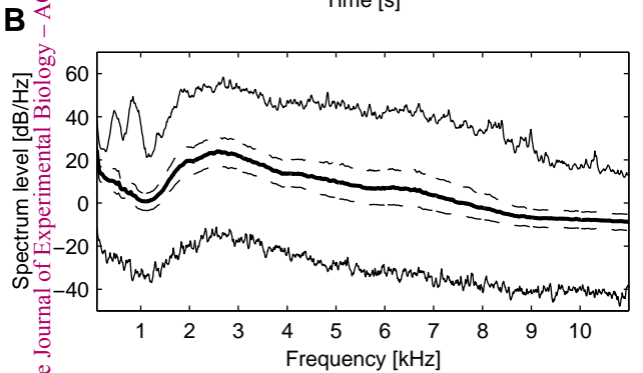

Source: https://cob.silverchair.com/jeb/article-pdf/doi/10.1242/jeb.113639/2033165/jeb_113639.pdf
